# Supplementary material for: Low diversity or poorly explored? Mesophotic molluscs highlight undersampling in the Eastern Mediterranean
Source: Springer Nature journal article supplement (doi:10.1007/s10531-020-02063-w), 2020-10-12
Supplement: MOESM1 [file 18475324]

# Low diversity or poorly explored? Mesophotic molluscs highlight undersampling in the Eastern Mediterranean

## Electronic Supplementary Material

Paolo G. Albano<sup>1</sup> (0000-0001-9876-1024), Michele Azzarone<sup>1</sup> (0000-0003-0197-6817), Bruno Amati<sup>2</sup> (0000-0002-3515-9543), Cesare Bogi<sup>3</sup> (0000-0001-7954-9562), Bruno Sabelli<sup>4</sup> (0000-0003-4300-3263), Gil Rilov<sup>5</sup> (0000-0002-1334-4887)

<sup>1</sup> Department of Palaeontology, University of Vienna, Althanstrasse 14, 1090 Vienna, Austria

<sup>2</sup> Largo Giuseppe Veratti, 37/D, 00146 Roma, Italy

<sup>3</sup> Gruppo Malacologico Livornese, c/o Museo di Storia Naturale del Mediterraneo, via Roma 234, 57127 Livorno, Italy

<sup>4</sup> Museo di Zoologia dell'Università di Bologna, via Selmi 3, 40126 Bologna, Italy

<sup>5</sup> National Institute of Oceanography, Israel Oceanographic and Limnological Research (IOLR), Haifa 3108001, Israel

Corresponding author: P.G. Albano, pgalbano@gmail.com

### Quantitative data

**Table S1.** Molluscs found at two mesophotic sites on hard (-92 m depth) and soft (-77/83 m depth) substrates off the coast of northern Israel (NIS: non-indigenous species).

| Class          | Family           | Genus              | Species                            | NIS | Hard substrate |               | Soft substrate |               | First record in Israel             |
|----------------|------------------|--------------------|------------------------------------|-----|----------------|---------------|----------------|---------------|------------------------------------|
|                |                  |                    |                                    |     | Living Shells  | Living Shells | Living Shells  | Living Shells |                                    |
| Polyplacophora | Hanleyidae       | <i>Hanleya</i>     | <i>hanleyi</i> (Bean, 1844)        | No  | 0              | 0             | 0              | 1             | This work                          |
| Gastropoda     | Fissurellidae    | <i>Diodora</i>     | <i>gibberula</i> (Lamarck, 1822)   | No  | 0              | 1             | 0              | 0             | (Haas 1937)                        |
| Gastropoda     | Fissurellidae    | <i>Emarginula</i>  | <i>adriatica</i> O.G. Costa, 1830  | No  | 2              | 5             | 0              | 0             | This work                          |
| Gastropoda     | Fissurellidae    | <i>Emarginula</i>  | <i>huzardii</i> (Payraudeau, 1826) | No  | 0              | 6             | 0              | 0             | (Barash and Danin 1992)            |
| Gastropoda     | Fissurellidae    | <i>Emarginula</i>  | <i>tenera</i> Locard, 1891         | No  | 0              | 2             | 0              | 0             | This work                          |
| Gastropoda     | Scissurellidae   | <i>Scissurella</i> | <i>costata</i> d'Orbigny, 1824     | No  | 0              | 15            | 0              | 1             | (Barash and Danin 1992)            |
| Gastropoda     | Trochidae        | <i>Jujubinus</i>   | <i>exasperatus</i> (Pennant, 1777) | No  | 0              | 2             | 0              | 0             | (Haas 1937)                        |
| Gastropoda     | Trochidae        | <i>Jujubinus</i>   | <i>montagui</i> (Wood, 1828)       | No  | 0              | 0             | 0              | 1             | (Barash and Danin 1992)            |
| Gastropoda     | Trochidae        | <i>Jujubinus</i>   | <i>striatus</i> (Linnaeus, 1758)   | No  | 0              | 1             | 0              | 0             | (Mienis and Ben-David-Zaslow 2004) |
| Gastropoda     | Calliostomatidae | <i>Calliostoma</i> | <i>conulus</i> (Linnaeus, 1758)    | No  | 1              | 9             | 0              | 4             | (Avnimelech and Boskovitz 1955)    |
| Gastropoda     | Turbinidae       | <i>Bolma</i>       | <i>rugosa</i> (Linnaeus, 1767)     | No  | 0              | 0             | 0              | 1             | (Haas 1937)                        |

| Class      | Family         | Genus               | Species                                             | NIS | Hard      |               | Soft      |               | First record in Israel             |
|------------|----------------|---------------------|-----------------------------------------------------|-----|-----------|---------------|-----------|---------------|------------------------------------|
|            |                |                     |                                                     |     | substrate | Living Shells | substrate | Living Shells |                                    |
| Gastropoda | Cerithiidae    | <i>Bittium</i>      | <i>latreillii</i> (Payraudeau, 1826)                | No  | 11        | 127           | 0         | 11            | (Mienis and Ben-David-Zaslow 2004) |
| Gastropoda | Cerithiidae    | <i>Bittium</i>      | <i>reticulatum</i> (da Costa, 1778)                 | No  | 0         | 24            | 0         | 0             | (Hart 1891)                        |
| Gastropoda | Cerithiidae    | <i>Bittium</i>      | <i>submamillatum</i> (de Rayneval & Ponzi, 1854)    | No  | 0         | 0             | 1         | 71            | (Barash and Danin 1992)            |
| Gastropoda | Siliquariidae  | <i>Petalopoma</i>   | <i>elisabettae</i> Schiaparelli, 2002               | No  | 0         | 23            | 0         | 0             | This work                          |
| Gastropoda | Siliquariidae  | <i>Tenagodus</i>    | <i>obtusus</i> (Schumacher, 1817)                   | No  | 0         | 7             | 0         | 2             | (Haas 1937)                        |
| Gastropoda | Turritellidae  | <i>Turritellina</i> | <i>tricarinata</i> (Brocchi, 1814)                  | No  | 0         | 1             | 0         | 2             | (Haas 1951)                        |
| Gastropoda | Turritellidae  | <i>Turritella</i>   | <i>turbona</i> Monterosato, 1877                    | No  | 7         | 63            | 0         | 4             | (Comay et al. 2015)                |
| Gastropoda | Epitoniidae    | <i>Aclis</i>        | <i>minor</i> (Brown, 1827)                          | No  | 0         | 0             | 1         | 0             | (Haas 1951)                        |
| Gastropoda | Epitoniidae    | <i>Epitonium</i>    | <i>algerianum</i> (Weinkauff, 1866)                 | No  | 0         | 0             | 0         | 2             | (Barash and Danin 1992)            |
| Gastropoda | Epitoniidae    | <i>Epitonium</i>    | <i>muricatum</i> (Risso, 1826)                      | No  | 0         | 0             | 0         | 2             | (Haas 1951)                        |
| Gastropoda | Epitoniidae    | <i>Epitonium</i>    | <i>tryoni</i> (de Boury, 1913)                      | No  | 0         | 0             | 0         | 1             | This work                          |
| Gastropoda | Naticidae      | <i>Naticarius</i>   | <i>stercusmuscarum</i> (Gmelin, 1791)               | No  | 0         | 0             | 0         | 2             | (Aharoni 1934)                     |
| Gastropoda | Triphoridae    | <i>Cheirodonta</i>  | <i>pallescens</i> (Jeffreys, 1867)                  | No  | 0         | 5             | 0         | 1             | This work                          |
| Gastropoda | Triphoridae    | <i>Marshallora</i>  | <i>adversa</i> (Montagu, 1803)                      | No  | 1         | 1             | 0         | 0             | This work                          |
| Gastropoda | Triphoridae    | <i>Metaxia</i>      | sp.                                                 | No  | 0         | 1             | 0         | 0             | This work                          |
| Gastropoda | Triphoridae    | <i>Metaxia</i>      | <i>metaxa</i> (Delle Chiaje, 1828)                  | No  | 0         | 2             | 0         | 0             | (Haas 1951)                        |
| Gastropoda | Triphoridae    | <i>Monophorus</i>   | <i>perversus</i> (Linnaeus, 1758)                   | No  | 0         | 1             | 0         | 0             | (Haas 1937)                        |
| Gastropoda | Triphoridae    | <i>Ionthoglossa</i> | <i>pseudocanarica</i> (Bouchet, 1985)               | No  | 1         | 7             | 0         | 0             | This work                          |
| Gastropoda | Triphoridae    | <i>Similiphora</i>  | <i>similior</i> (Bouchet & Guillemot, 1978)         | No  | 1         | 0             | 0         | 0             | This work                          |
| Gastropoda | Cerithiopsidae | <i>Cerithiopsis</i> | <i>diadema</i> Monterosato, 1874                    | No  | 0         | 5             | 0         | 2             | (Barash and Danin 1992)            |
| Gastropoda | Cerithiopsidae | <i>Cerithiopsis</i> | <i>pulchresculpta</i> Cachia, Mifsud & Sammut, 2004 | No  | 0         | 1             | 0         | 0             | This work                          |
| Gastropoda | Cerithiopsidae | <i>Cerithiopsis</i> | <i>scalaris</i> Locard, 1892                        | No  | 0         | 1             | 0         | 1             | This work                          |
| Gastropoda | Cerithiopsidae | <i>Dizoniopsis</i>  | <i>concatenata</i> (Conti, 1864)                    | No  | 1         | 1             | 0         | 0             | (Barash and Danin 1992)            |
| Gastropoda | Cerithiopsidae | <i>Krachia</i>      | <i>cylindrata</i> (Jeffreys, 1885)                  | No  | 1         | 2             | 0         | 0             | This work                          |
| Gastropoda | Rissoidae      | <i>Alvania</i>      | <i>beani</i> (Hanley in Thorpe, 1844)               | No  | 0         | 4             | 0         | 1             | (Avnimelech and Boskovitz 1955)    |
| Gastropoda | Rissoidae      | <i>Alvania</i>      | <i>mamillata</i> Risso, 1826                        | No  | 6         | 94            | 0         | 0             | This work                          |
| Gastropoda | Rissoidae      | <i>Alvania</i>      | <i>testae</i> (Aradas & Maggiore, 1844)             | No  | 0         | 3             | 0         | 0             | (Haas 1951)                        |
| Gastropoda | Rissoidae      | <i>Crisilla</i>     | <i>semistriata</i> (Montagu, 1808)                  | No  | 0         | 1             | 0         | 0             | (Pallary 1938)                     |
| Gastropoda | Rissoidae      | <i>Obtusella</i>    | <i>macilenta</i> (Monterosato, 1880)                | No  | 0         | 3             | 0         | 10            | (Mienis 1983)                      |
| Gastropoda | Rissoidae      | <i>Pusillina</i>    | <i>inconspicua</i> (Alder, 1844)                    | No  | 1         | 24            | 0         | 2             | (van Aartsen et al. 1989)          |
| Gastropoda | Rissoidae      | <i>Setia</i>        | <i>amabilis</i> (Locard, 1886)                      | No  | 0         | 3             | 0         | 0             | This work                          |
| Gastropoda | Iravadiidae    | <i>Hyala</i>        | <i>vitrea</i> (Montagu, 1803)                       | No  | 0         | 0             | 0         | 2             | (Barash and Danin 1992)            |
| Gastropoda | Eulimidae      | <i>Melanella</i>    | sp.                                                 | Yes | 2         | 0             | 0         | 0             | This work                          |
| Gastropoda | Eulimidae      | <i>Parvioris</i>    | sp.                                                 | Yes | 1         | 0             | 0         | 0             | This work                          |
| Gastropoda | Eulimidae      | <i>Nanobalcis</i>   | <i>nana</i> (Monterosato, 1878)                     | No  | 0         | 8             | 0         | 0             | (Mienis and Ben-David-Zaslow 2004) |
| Gastropoda | Eulimidae      | <i>Sticteulima</i>  | <i>jeffreysiana</i> (Brusina, 1869)                 | No  | 7         | 12            | 0         | 1             | (van Aartsen et al. 1989)          |
| Gastropoda | Cypraeidae     | <i>Luria</i>        | <i>lurida</i> (Linnaeus, 1758)                      | No  | 1         | 0             | 0         | 0             | (Mienis and Ben-David-Zaslow 2004) |
| Gastropoda | Cypraeidae     | <i>Naria</i>        | <i>spurca</i> (Linnaeus, 1758)                      | No  | 0         | 0             | 0         | 1             | (Aharoni 1934)                     |
| Gastropoda | Aporrhaidae    | <i>Aporrhais</i>    | <i>pespelecani</i> (Linnaeus, 1758)                 | No  | 0         | 0             | 0         | 4             | (Pallary 1938)                     |
| Gastropoda | Marginellidae  | <i>Volvarina</i>    | <i>mitrella</i> (Risso, 1826)                       | No  | 0         | 0             | 0         | 1             | (Haas 1937)                        |

| Class      | Family            | Genus                  | Species                                               | NIS | Hard      |               | Soft      |               | First record in Israel      |
|------------|-------------------|------------------------|-------------------------------------------------------|-----|-----------|---------------|-----------|---------------|-----------------------------|
|            |                   |                        |                                                       |     | substrate | Living Shells | substrate | Living Shells |                             |
| Gastropoda | Granulinidae      | <i>Granulina</i>       | <i>melitensis</i> Smriglio, Mariottini & Rufini, 1998 | No  | 1         | 13            | 0         | 3             | This work                   |
| Gastropoda | Buccinidae        | <i>Euthria</i>         | <i>cornea</i> (Linnaeus, 1758)                        | No  | 0         | 0             | 0         | 1             | (Aharoni 1934)              |
| Gastropoda | Colubrariidae     | <i>Cumia</i>           | <i>reticulata</i> (Blainville, 1829)                  | No  | 0         | 10            | 0         | 0             | (Haas 1937)                 |
| Gastropoda | Columbellidae     | <i>Mitrella</i>        | <i>coccinea</i> (Philippi, 1836)                      | No  | 2         | 18            | 0         | 0             | This work                   |
| Gastropoda | Columbellidae     | <i>Mitrella</i>        | <i>minor</i> (Scacchi, 1836)                          | No  | 0         | 0             | 0         | 3             | (Haas 1951)                 |
| Gastropoda | Columbellidae     | <i>Mitrella</i>        | <i>svelta</i> Kobelt, 1889                            | No  | 1         | 3             | 0         | 0             | This work                   |
| Gastropoda | Fascioliidae      | <i>Fusinus</i>         | <i>buzzurroi</i> Prkić & Russo, 2008                  | No  | 2         | 8             | 0         | 1             | This work                   |
| Gastropoda | Nassariidae       | <i>Nassarius</i>       | <i>turulosis</i> (Risso, 1826)                        | No  | 0         | 7             | 0         | 2             | (Haas 1951)                 |
| Gastropoda | Nassariidae       | <i>Tritia</i>          | <i>incrassata</i> (Strøm, 1768)                       | No  | 0         | 1             | 0         | 1             | (Hart 1891)                 |
| Gastropoda | Nassariidae       | <i>Tritia</i>          | <i>pygmaea</i> (Lamarck, 1822)                        | No  | 0         | 0             | 0         | 24            | (Nordsieck 1972)            |
| Gastropoda | Pisaniidae        | <i>Enginella</i>       | <i>leucozona</i> (Philippi, 1844)                     | No  | 2         | 13            | 0         | 0             | (Hart 1891)                 |
| Gastropoda | Muricidae         | <i>Coralliophila</i>   | <i>meyendorffii</i> (Calcara, 1845)                   | No  | 0         | 2             | 0         | 0             | (Barash and Danin 1992)     |
| Gastropoda | Muricidae         | <i>Muricopsis</i>      | <i>cristata</i> (Brocchi, 1814)                       | No  | 0         | 2             | 0         | 0             | (Hart 1891)                 |
| Gastropoda | Muricidae         | <i>Typhinellus</i>     | <i>labiatus</i> (de Cristofori & Jan, 1832)           | No  | 0         | 0             | 0         | 1             | (Haas 1937)                 |
| Gastropoda | Borsoniidae       | <i>Drilliola</i>       | <i>loprestiana</i> (Calcara, 1841)                    | No  | 0         | 0             | 0         | 1             | (Haas 1951)                 |
| Gastropoda | Clathrellidae     | <i>Comarmondia</i>     | <i>gracilis</i> (Montagu, 1803)                       | No  | 0         | 0             | 0         | 1             | (Haas 1951)                 |
| Gastropoda | Drilliidae        | <i>Crassopleura</i>    | <i>maravignae</i> (Bivona Ant. in Bivona And., 1838)  | No  | 5         | 7             | 0         | 0             | (Haas 1951)                 |
| Gastropoda | Horacilavidae     | <i>Haedropleura</i>    | <i>secalina</i> (Philippi, 1844)                      | No  | 0         | 1             | 0         | 0             | This work                   |
| Gastropoda | Mangeliidae       | <i>Bela</i>            | <i>zenetouae</i> (van Aartsen, 1988)                  | No  | 0         | 0             | 0         | 1             | (van Aartsen 1988)          |
| Gastropoda | Mangeliidae       | <i>Mangelia</i>        | <i>costata</i> (Pennant, 1777)                        | No  | 0         | 2             | 0         | 0             | (Barash and Danin 1992)     |
| Gastropoda | Mangeliidae       | <i>Mangelia</i>        | <i>costulata</i> Risso, 1826                          | No  | 0         | 1             | 0         | 0             | (Nordsieck 1972)            |
| Gastropoda | Mangeliidae       | <i>Sorgenfreispira</i> | <i>brachystoma</i> (Philippi, 1844)                   | No  | 0         | 0             | 0         | 2             | (Haas 1951)                 |
| Gastropoda | Mitromorphidae    | <i>Mitromorpha</i>     | <i>columbellaria</i> (Scacchi, 1836)                  | No  | 1         | 10            | 0         | 0             | (Haas 1951)                 |
| Gastropoda | Raphitomidae      | <i>Clathromangelia</i> | <i>granum</i> (Philippi, 1844)                        | No  | 0         | 5             | 0         | 0             | (Barash and Danin 1992)     |
| Gastropoda | Raphitomidae      | <i>Raphitoma</i>       | <i>leufroyi</i> (Michaud, 1828)                       | No  | 0         | 1             | 0         | 0             | (Barash and Danin 1992)     |
| Gastropoda | Raphitomidae      | <i>Raphitoma</i>       | <i>linearis</i> (Montagu, 1803)                       | No  | 0         | 1             | 0         | 0             | (Barash and Danin 1992)     |
| Gastropoda | Raphitomidae      | <i>Raphitoma</i>       | <i>pseudohystrix</i> (Sykes, 1906)                    | No  | 0         | 3             | 0         | 0             | (Barash and Danin 1992)     |
| Gastropoda | Architectonicidae | <i>Pseudomalaxis</i>   | <i>zancleus</i> (Philippi, 1844)                      | No  | 0         | 2             | 0         | 0             | (Barash and Danin 1992)     |
| Gastropoda | Architectonicidae | <i>Solatisonax</i>     | <i>alleryi</i> (Seguenza G., 1876)                    | No  | 0         | 7             | 0         | 1             | (Haas 1951)                 |
| Gastropoda | Mathildidae       | <i>Mathilda</i>        | <i>bieleri</i> Smriglio & Mariottini, 2007            | No  | 0         | 1             | 0         | 0             | This work                   |
| Gastropoda | Cimidae           | <i>Graphis</i>         | <i>albida</i> (Kanmacher, 1798)                       | No  | 0         | 0             | 0         | 1             | This work                   |
| Gastropoda | Pleurobranchidae  | <i>Berthella</i>       | <i>plumula</i> (Montagu, 1803)                        | No  | 0         | 1             | 0         | 0             | (O'Donoghue and White 1940) |
| Gastropoda | Ringiculidae      | <i>Ringicula</i>       | <i>auriculata</i> (Ménard de la Groye, 1811)          | No  | 0         | 0             | 0         | 16            | (Haas 1937)                 |
| Gastropoda | Chromodorididae   | <i>Felimare</i>        | <i>picta</i> (Philippi, 1836)                         | No  | 1         | 0             | 0         | 0             | (Barash and Danin 1971)     |
| Gastropoda | Myrrhinidae       | <i>Dondice</i>         | <i>banyulensis</i> Portmann & Sandmeier, 1960         | No  | 1         | 0             | 0         | 0             | This work                   |
| Gastropoda | Tyloidiidae       | <i>Tyloдина</i>        | <i>perversa</i> (Gmelin, 1791)                        | No  | 0         | 2             | 0         | 0             | This work                   |
| Gastropoda | Notodiaphanidae   | <i>Notodiaphana</i>    | <i>atlantica</i> Ortea, Moro & Espinosa, 2013         | No  | 0         | 2             | 0         | 0             | This work                   |
| Gastropoda | Retusidae         | <i>Pyrunculus</i>      | <i>hoernesi</i> (Weinkauff, 1866)                     | No  | 0         | 4             | 0         | 0             | This work                   |
| Gastropoda | Retusidae         | <i>Retusa</i>          | <i>minutissima</i> Thiele, 1931                       | No  | 0         | 0             | 0         | 1             | (van Aartsen et al. 1989)   |

| Class      | Family         | Genus               | Species                                                  | NIS | Hard      |               | Soft      |               | First record in Israel    |
|------------|----------------|---------------------|----------------------------------------------------------|-----|-----------|---------------|-----------|---------------|---------------------------|
|            |                |                     |                                                          |     | substrate | Living Shells | substrate | Living Shells |                           |
| Gastropoda | Philinidae     | <i>Philine</i>      | <i>punctata</i> (J. Adams, 1800)                         | No  | 0         | 0             | 0         | 1             | This work                 |
| Gastropoda | Pyramidellidae | <i>Eulimella</i>    | <i>acicula</i> (Philippi, 1836)                          | No  | 0         | 1             | 0         | 2             | (Haas 1951)               |
| Gastropoda | Pyramidellidae | <i>Eulimella</i>    | <i>scillae</i> (Scacchi, 1836)                           | No  | 0         | 0             | 0         | 2             | (Barash and Danin 1992)   |
| Gastropoda | Pyramidellidae | <i>Eulimella</i>    | <i>ventricosa</i> (Forbes, 1844)                         | No  | 1         | 8             | 0         | 0             | (Barash and Danin 1992)   |
| Gastropoda | Pyramidellidae | <i>Megastomia</i>   | <i>conoidea</i> (Brocchi, 1814)                          | No  | 0         | 2             | 0         | 10            | (Haas 1937)               |
| Gastropoda | Pyramidellidae | <i>Odostomella</i>  | <i>bicincta</i> (Tiberi, 1868)                           | No  | 0         | 8             | 0         | 1             | This work                 |
| Gastropoda | Pyramidellidae | <i>Odostomella</i>  | <i>doliolum</i> (Philippi, 1844)                         | No  | 2         | 0             | 0         | 0             | (Barash and Danin 1992)   |
| Gastropoda | Pyramidellidae | <i>Odostomia</i>    | <i>acuta</i> Jeffreys, 1848                              | No  | 0         | 1             | 0         | 0             | (Barash and Danin 1992)   |
| Gastropoda | Pyramidellidae | <i>Odostomia</i>    | <i>lukisii</i> Jeffreys, 1859                            | No  | 0         | 1             | 0         | 0             | (Nordsieck 1972)          |
| Gastropoda | Pyramidellidae | <i>Odostomia</i>    | <i>sicula</i> sensu Auctores non Philippi, 1851          | No  | 0         | 1             | 0         | 0             | This work                 |
| Gastropoda | Pyramidellidae | <i>Odostomia</i>    | <i>turrita</i> Hanley, 1844                              | No  | 0         | 3             | 0         | 0             | This work                 |
| Gastropoda | Pyramidellidae | <i>Odostomia</i>    | <i>unidentata</i> (Montagu, 1803)                        | No  | 0         | 5             | 0         | 0             | (Haas 1951)               |
| Gastropoda | Pyramidellidae | <i>Parthenina</i>   | <i>interstincta</i> (J. Adams, 1797)                     | No  | 0         | 0             | 0         | 4             | (Nordsieck 1972)          |
| Gastropoda | Pyramidellidae | <i>Parthenina</i>   | <i>penchynati</i> (Bucquoy, Dautzenberg & Dollfus, 1883) | No  | 0         | 5             | 0         | 4             | This work                 |
| Gastropoda | Pyramidellidae | <i>Parthenina</i>   | <i>suturalis</i> (Philippi, 1844)                        | No  | 0         | 3             | 0         | 0             | (van Aartsen et al. 1989) |
| Gastropoda | Pyramidellidae | <i>Pyrgulina</i>    | <i>stefanisi</i> (Jeffreys, 1869)                        | No  | 0         | 0             | 0         | 2             | This work                 |
| Gastropoda | Pyramidellidae | <i>Tibersyrnola</i> | <i>unifasciata</i> (Forbes, 1844)                        | No  | 0         | 3             | 0         | 0             | This work                 |
| Gastropoda | Pyramidellidae | <i>Tragula</i>      | <i>fenestrata</i> (Jeffreys, 1848)                       | No  | 0         | 1             | 0         | 0             | (Barash and Danin 1992)   |
| Gastropoda | Pyramidellidae | <i>Turbonilla</i>   | <i>cangeyrani</i> Ovalis & Mifsud, 2017                  | Yes | 0         | 1             | 0         | 0             | This work                 |
| Gastropoda | Pyramidellidae | <i>Turbonilla</i>   | <i>gradata</i> Bucquoy, Dautzenberg & Dollfus, 1883      | No  | 0         | 1             | 0         | 0             | (Haas 1951)               |
| Gastropoda | Pyramidellidae | <i>Turbonilla</i>   | <i>lactea</i> (Linnaeus, 1758)                           | No  | 0         | 0             | 0         | 2             | (Haas 1951)               |
| Gastropoda | Pyramidellidae | <i>Turbonilla</i>   | <i>pusilla</i> (Philippi, 1844)                          | No  | 0         | 4             | 0         | 0             | (van Aartsen et al. 1989) |
| Gastropoda | Amathinidae    | <i>Clathrella</i>   | <i>clathrata</i> (Philippi, 1844)                        | No  | 0         | 2             | 0         | 0             | (Barash and Danin 1992)   |
| Bivalvia   | Nuculidae      | <i>Nucula</i>       | <i>nitidosa</i> Winckworth, 1930                         | No  | 0         | 1             | 0         | 7             | (Barash and Danin 1992)   |
| Bivalvia   | Nuculidae      | <i>Nucula</i>       | <i>sulcata</i> Bronn, 1831                               | No  | 0         | 1             | 0         | 3             | (Haas 1951)               |
| Bivalvia   | Nuculanidae    | <i>Lembulus</i>     | <i>pella</i> (Linnaeus, 1758)                            | No  | 0         | 0             | 0         | 2             | (Haas 1937)               |
| Bivalvia   | Nuculanidae    | <i>Saccella</i>     | <i>commutata</i> (Philippi, 1844)                        | No  | 0         | 12            | 0         | 7             | (Haas 1951)               |
| Bivalvia   | Mytilidae      | <i>Crenella</i>     | <i>arenaria</i> Monterosato, 1875 ex H. Martin, ms.      | No  | 0         | 1             | 1         | 0             | (Mienis and Rittner 2014) |
| Bivalvia   | Mytilidae      | <i>Crenella</i>     | <i>pellucida</i> (Jeffreys, 1859)                        | No  | 0         | 1             | 0         | 0             | This work                 |
| Bivalvia   | Mytilidae      | <i>Dacrydium</i>    | <i>hyalinum</i> (Monterosato, 1875)                      | No  | 4         | 6             | 0         | 0             | (Barash and Danin 1992)   |
| Bivalvia   | Mytilidae      | <i>Gregariella</i>  | <i>semigranata</i> (Reeve, 1858)                         | No  | 56        | 102           | 2         | 1             | This work                 |
| Bivalvia   | Mytilidae      | <i>Modiolula</i>    | <i>phaseolina</i> (Philippi, 1844)                       | No  | 3         | 6             | 0         | 1             | (van Aartsen et al. 1989) |
| Bivalvia   | Mytilidae      | <i>Musculus</i>     | <i>subpictus</i> (Cantraine, 1835)                       | No  | 1         | 3             | 0         | 4             | (Barash and Danin 1992)   |
| Bivalvia   | Mytilidae      | <i>Septifer</i>     | <i>cumingii</i> Récluz, 1848                             | Yes | 0         | 3             | 0         | 0             | This work                 |
| Bivalvia   | Arcidae        | <i>Acar</i>         | <i>clathrata</i> (Defrance, 1816)                        | No  | 0         | 1             | 0         | 0             | (Moshkovitz 1963)         |
| Bivalvia   | Arcidae        | <i>Anadara</i>      | <i>corbuloides</i> (Monterosato, 1881)                   | No  | 0         | 1             | 0         | 23            | This work                 |
| Bivalvia   | Arcidae        | <i>Arca</i>         | <i>tetragona</i> Poli, 1795                              | No  | 0         | 1             | 0         | 0             | (Barash and Danin 1992)   |

| Class    | Family          | Genus                  | Species                                          | NIS | Hard      |               | Soft      |               | First record in Israel    |
|----------|-----------------|------------------------|--------------------------------------------------|-----|-----------|---------------|-----------|---------------|---------------------------|
|          |                 |                        |                                                  |     | substrate | Living Shells | substrate | Living Shells |                           |
| Bivalvia | Arcidae         | <i>Asperarca</i>       | <i>magdalenae</i> La Perna, 1998                 | No  | 0         | 1             | 0         | 0             | This work                 |
| Bivalvia | Arcidae         | <i>Barbatia</i>        | <i>barbata</i> (Linnaeus, 1758)                  | No  | 0         | 0             | 0         | 1             | (Hart 1891)               |
| Bivalvia | Glycymerididae  | <i>Glycymeris</i>      | <i>glycymeris</i> (Linnaeus, 1758)               | No  | 0         | 2             | 0         | 0             | (Weinkauff 1867)          |
| Bivalvia | Noetiidae       | <i>Striarca</i>        | <i>lactea</i> (Linnaeus, 1758)                   | No  | 1         | 27            | 1         | 24            | (Haas 1937)               |
| Bivalvia | Anomiidae       | <i>Anomia</i>          | <i>ephippium</i> Linnaeus, 1758                  | No  | 0         | 0             | 0         | 1             | (Haas 1937)               |
| Bivalvia | Pectinidae      | <i>Aequipecten</i>     | <i>opercularis</i> (Linnaeus, 1758)              | No  | 0         | 0             | 0         | 1             | (Haas 1951)               |
| Bivalvia | Pectinidae      | <i>Karnekampia</i>     | <i>sulcata</i> (Müller, 1776)                    | No  | 0         | 1             | 0         | 0             | (Huber 2010)              |
| Bivalvia | Pectinidae      | <i>Mimachlamys</i>     | <i>varia</i> (Linnaeus, 1758)                    | No  | 0         | 1             | 0         | 1             | (Hart 1891)               |
| Bivalvia | Pectinidae      | <i>Palliolum</i>       | <i>incomparabile</i> (Risso, 1826)               | No  | 0         | 0             | 0         | 1             | (van Aartsen et al. 1989) |
| Bivalvia | Pectinidae      | <i>Talochlamys</i>     | <i>multistriata</i> (Poli, 1795)                 | No  | 0         | 1             | 0         | 0             | (Barash and Danin 1992)   |
| Bivalvia | Propeamussiidae | <i>Similipecten</i>    | <i>similis</i> (Laskey, 1811)                    | No  | 0         | 1             | 0         | 22            | (Barash and Danin 1992)   |
| Bivalvia | Limidae         | <i>Lima</i>            | <i>lima</i> (Linnaeus, 1758)                     | No  | 0         | 1             | 0         | 0             | (Aharoni 1934)            |
| Bivalvia | Limidae         | <i>Limatula</i>        | <i>gwyni</i> (Sykes, 1903)                       | No  | 0         | 1             | 0         | 0             | (van Aartsen et al. 1989) |
| Bivalvia | Lucinidae       | <i>Loripinus</i>       | <i>fragilis</i> (Philippi, 1836)                 | No  | 0         | 1             | 0         | 0             | (Barash and Danin 1992)   |
| Bivalvia | Carditidae      | <i>Centrocardita</i>   | <i>aculeata</i> (Poli, 1795)                     | No  | 0         | 5             | 0         | 13            | (Haas 1951)               |
| Bivalvia | Carditidae      | <i>Glans</i>           | <i>trapezia</i> (Linnaeus, 1767)                 | No  | 0         | 1             | 0         | 0             | (Haas 1937)               |
| Bivalvia | Trapezidae      | <i>Coralliophaga</i>   | <i>lithophagella</i> (Lamarck, 1819)             | No  | 0         | 1             | 0         | 0             | (Barash and Danin 1992)   |
| Bivalvia | Cardiidae       | <i>Papillicardium</i>  | <i>papillosum</i> (Poli, 1791)                   | No  | 0         | 1             | 0         | 7             | (Haas 1951)               |
| Bivalvia | Cardiidae       | <i>Parvicardium</i>    | <i>exiguum</i> (Gmelin, 1791)                    | No  | 0         | 2             | 0         | 0             | (Lipkin and Safriel 1971) |
| Bivalvia | Cardiidae       | <i>Parvicardium</i>    | <i>minimum</i> (Philippi, 1836)                  | No  | 0         | 3             | 0         | 13            | (Moshkovitz 1963)         |
| Bivalvia | Cardiidae       | <i>Parvicardium</i>    | <i>scabrum</i> (Philippi, 1844)                  | No  | 0         | 0             | 0         | 16            | This work                 |
| Bivalvia | Lasaeidae       | cf. <i>Draculamyia</i> | <i>porobranchiata</i> P.G. Oliver & Lützen, 2011 | No  | 1         | 1             | 0         | 0             | This work                 |
| Bivalvia | Lasaeidae       | <i>Kelliopsis</i>      | <i>jozinae</i> van Aartsen & Carrozza, 1997      | No  | 1         | 2             | 0         | 1             | This work                 |
| Bivalvia | Lasaeidae       | <i>Kurtiella</i>       | <i>bidentata</i> (Montagu, 1803)                 | No  | 0         | 2             | 0         | 8             | (Haas 1951)               |
| Bivalvia | Lasaeidae       | <i>Montacuta</i>       | <i>goudi</i> van Aartsen, 1997                   | No  | 0         | 0             | 0         | 1             | This work                 |
| Bivalvia | Lasaeidae       | <i>Tellimya</i>        | <i>ferruginosa</i> (Montagu, 1808)               | No  | 0         | 0             | 0         | 1             | (Barash and Danin 1992)   |
| Bivalvia | Kelliellidae    | <i>Kelliella</i>       | <i>miliaris</i> (Philippi, 1844)                 | No  | 1         | 4             | 0         | 0             | Janssen (1989)            |
| Bivalvia | Tellinidae      | <i>Moerella</i>        | <i>distorta</i> (Poli, 1791)                     | No  | 0         | 0             | 0         | 1             | (Haas 1951)               |
| Bivalvia | Semelidae       | <i>Abra</i>            | <i>alba</i> (W. Wood, 1802)                      | No  | 0         | 2             | 0         | 10            | (Haas 1951)               |
| Bivalvia | Ungulinidae     | <i>Diplodonta</i>      | <i>brocchii</i> (Deshayes, 1850)                 | No  | 0         | 1             | 0         | 0             | (Barash and Danin 1992)   |
| Bivalvia | Veneridae       | <i>Dosinia</i>         | <i>lupinus</i> (Linnaeus, 1758)                  | No  | 0         | 1             | 0         | 1             | (Haas 1951)               |
| Bivalvia | Veneridae       | <i>Globivenus</i>      | <i>effossa</i> (Philippi, 1836)                  | No  | 0         | 1             | 0         | 1             | This work                 |
| Bivalvia | Veneridae       | <i>Gouldia</i>         | <i>minima</i> (Montagu, 1803)                    | No  | 0         | 1             | 0         | 1             | (Haas 1951)               |
| Bivalvia | Veneridae       | <i>Pitar</i>           | <i>mediterraneus</i> (Aradas & Benoit, 1872)     | No  | 0         | 3             | 0         | 30            | This work                 |
| Bivalvia | Veneridae       | <i>Timoclea</i>        | <i>ovata</i> (Pennant, 1777)                     | No  | 0         | 4             | 0         | 30            | (Haas 1951)               |
| Bivalvia | Veneridae       | <i>Venus</i>           | <i>casina</i> Linnaeus, 1758                     | No  | 0         | 0             | 0         | 1             | (Barash and Danin 1992)   |
| Bivalvia | Myidae          | <i>Sphenia</i>         | <i>binghami</i> Turton, 1822                     | No  | 3         | 4             | 0         | 0             | (Barash and Danin 1992)   |
| Bivalvia | Hiatellidae     | <i>Hiatella</i>        | <i>arctica</i> (Linnaeus, 1767)                  | No  | 0         | 4             | 0         | 4             | (Haas 1951)               |
| Bivalvia | Hiatellidae     | <i>Hiatella</i>        | <i>rugosa</i> (Linnaeus, 1767)                   | No  | 0         | 1             | 0         | 0             | (Barash and Danin 1992)   |
| Bivalvia | Cuspidariidae   | <i>Cardiomya</i>       | <i>costellata</i> (Deshayes, 1835)               | No  | 0         | 1             | 0         | 1             | (Haas 1951)               |
| Bivalvia | Cuspidariidae   | <i>Cuspidaria</i>      | <i>rostrata</i> (Spengler, 1793)                 | No  | 0         | 1             | 0         | 0             | (Haas 1951)               |

| Class      | Family      | Genus            | Species                                   | NIS | Hard substrate |               | Soft substrate |               | First record in Israel |
|------------|-------------|------------------|-------------------------------------------|-----|----------------|---------------|----------------|---------------|------------------------|
|            |             |                  |                                           |     | Living Shells  | Living Shells | Living Shells  | Living Shells |                        |
| Scaphopoda | Gadilidae   | <i>Dischides</i> | <i>politus</i> (S. Wood, 1842)            | No  | 0              | 0             | 0              | 7             | (Haas 1951)            |
| Scaphopoda | Dentaliidae | <i>Antalis</i>   | <i>inaequicostata</i> (Dautzenberg, 1891) | No  | 0              | 0             | 0              | 11            | (Caprotti 1965)        |
| Scaphopoda | Entalinidae | <i>Entalina</i>  | <i>tetragona</i> (Brocchi, 1814)          | No  | 0              | 1             | 0              | 0             | (Haas 1951)            |

## References

- Aharoni J (1934) From Ashqelon to Rubin. *Teva va-Aretz* 2:472–476
- Avnimelech MA, Boskovitz V (1955) Some problems of the present distribution of molluscan shells on the Mediterranean coast of Israel. *Bulletin of the Research Council of Israel* 5B:178–188
- Barash A, Danin Z (1992) Annotated list of Mediterranean molluscs of Israel and Sinai. The Israel Academy of Sciences and Humanities, Jerusalem
- Barash A, Danin Z (1971) Opisthobranchia (Mollusca) from the Mediterranean waters of Israel. *Israel Journal of Zoology* 20:151–200
- Caprotti E (1965) Notes on the Mediterranean Dentaliidae (Studies on Scaphopoda, V). *Atti della Società Italiana di Scienze Naturali e del Museo Civico di Storia Naturale di Milano* 104:339–354
- Comay O, Edelman-Furstenberg Y, Ben-Ami F (2015) Patterns in molluscan death assemblages along the Israeli Mediterranean continental shelf. *Quaternary International* 390:21–28. <https://doi.org/10.1016/j.quaint.2015.05.004>
- Haas G (1937) Mollusca Marina. In: Bodenheimer F.S. (eds). In: *Prodromus Faunae Palaestinae. Essai sur les éléments zoogéographiques et historiques du sud-ouest du sous-règne paléarctique*. Imprimerie de l'Institut Français d'Archéologie Orientale, Cairo
- Haas G (1951) Preliminary report on the Molluscs of the Palestine coastal shelf. *Bulletin Sea Fisheries Research Station Israel* 1:1–20
- Hart HC (1891) Some account of the fauna and flora of Sinai, Petra and Wâdy 'Arabah. The Committee of the Palestine Exploration Fund, London
- Huber M (2010) *Compendium of bivalves*. ConchBooks, Hackenheim
- Lipkin Y, Safriel U (1971) Intertidal zonation on rocky shores at Mikhmoret (Mediterranean, Israel). *Journal of Ecology* 59:1–30
- Mienis HK (1983) Recent publications concerning our region, 11. *Levantina* 45:532–534
- Mienis HK, Ben-David-Zaslow R (2004) A preliminary list of the marine molluscs of the National Park and Nature reserve of Akhziv-Rosh Haniqra. *Triton* 10:13–37
- Mienis HK, Rittner O (2014) Finds of new or little known molluscs from the Levantine Sea off Israel 1. *Triton* 30:5–8

- Moshkovitz S (1963) The Mollusca in the upper part of the "Sakiebeds" (Upper Neogene-Lower Pleistocene) in the Central Coastal Plain of Israel. Israel Journal of Earth Sciences 12:97–146
- Nordsieck F (1972) Marine Gastropoden aus der Shiqmona-Bucht in Israel. Archive für Molluskenkunde 102:227–245
- O'Donoghue CH, White KM (1940) A collection of marine molluscs, mainly opisthobranchs, from Palestine. Proceedings of the Malacological Society of London 24:92–96
- Pallary P (1938) Les mollusques marins de la Syrie. Journal de Conchyliologie 82:5–58
- van Aartsen JJ (1988) Molluschi d'Europa: note su specie poco conosciute. XII. *Belamenkhorsti* nom. nov. = *Pleurotoma nana* Scacchi, 1836 non Deshayes, 1835 e *Fehria* (nov. gen.) *zenetouae* n. sp.. La Conchiglia 20:30–31
- van Aartsen JJ, Barash A, Carrozza F (1989) Addition to the knowledge of the Mediterranean Mollusca of Israel and Sinai. Bollettino Malacologico 25:63–76
- Weinkauff HC (1867) Die Conchylien des Mittelmeeres, ihre geographische und geologische Verbreitung. Vol. 1., Mollusca Acephalia. T. Fischer, Cassel
